# Supplementary material for: Cyclopentadienyl Ruthenium(II) Complex-Mediated Oxidation of Benzylic and Allylic Alcohols to Corresponding Aldehydes
Source: Hindawi journal article supplement (doi:10.1155/2019/5053702), 2019-08-18
Supplement: f1 [file 5053702.f1.zip]

Archive with 2 entries (2 files):
- 5053702.f1/1 h-nmr characteristic identification of compounds 3, 4, 5_htrc_2838793.pptx
- 5053702.f1/mat.5053702.v3.doc
